# Supplementary material
Source: publisher figshare collection journal article supplement (https://acs.figshare.com/ndownloader/files/5839464)
Supplement: Supplementary file 1 [file 5839464]

 
data_estr423
 
_audit_creation_method            SHELXL-97 
_chemical_name_systematic 
; 
 ? 
; 
_chemical_name_common             ? 
_chemical_melting_point           ? 
_chemical_formula_moiety          ? 
_chemical_formula_sum 
 'C15 H19 Cl2 N3 O2 Pd S' 
_chemical_formula_weight          482.69 
 
loop_ 
 _atom_type_symbol 
 _atom_type_description 
 _atom_type_scat_dispersion_real 
 _atom_type_scat_dispersion_imag 
 _atom_type_scat_source 
 'C'  'C'   0.0033   0.0016 
 'International Tables Vol C Tables 4.2.6.8 and 6.1.1.4' 
 'H'  'H'   0.0000   0.0000 
 'International Tables Vol C Tables 4.2.6.8 and 6.1.1.4' 
 'N'  'N'   0.0061   0.0033 
 'International Tables Vol C Tables 4.2.6.8 and 6.1.1.4' 
 'O'  'O'   0.0106   0.0060 
 'International Tables Vol C Tables 4.2.6.8 and 6.1.1.4' 
 'S'  'S'   0.1246   0.1234 
 'International Tables Vol C Tables 4.2.6.8 and 6.1.1.4' 
 'Cl'  'Cl'   0.1484   0.1585 
 'International Tables Vol C Tables 4.2.6.8 and 6.1.1.4' 
 'Pd'  'Pd'  -0.9988   1.0072 
 'International Tables Vol C Tables 4.2.6.8 and 6.1.1.4' 
 
_symmetry_cell_setting            monoclinic
_symmetry_space_group_name_H-M    'P2(1)/n'
 
loop_ 
 _symmetry_equiv_pos_as_xyz 
 'x, y, z' 
 '-x+1/2, y+1/2, -z+1/2' 
 '-x, -y, -z' 
 'x-1/2, -y-1/2, z-1/2' 
 
_cell_length_a                    9.6111(9) 
_cell_length_b                    14.6706(11) 
_cell_length_c                    13.4125(6) 
_cell_angle_alpha                 90.00 
_cell_angle_beta                  96.160(5) 
_cell_angle_gamma                 90.00 
_cell_volume                      1880.3(2) 
_cell_formula_units_Z             4 
_cell_measurement_temperature     298(1) 
_cell_measurement_reflns_used     25
_cell_measurement_theta_min       13.7
_cell_measurement_theta_max       16.0
 
_exptl_crystal_description        irregular
_exptl_crystal_colour             orange
_exptl_crystal_size_max           0.34 
_exptl_crystal_size_mid           0.18 
_exptl_crystal_size_min           0.14 
_exptl_crystal_density_meas       ? 
_exptl_crystal_density_diffrn     1.705 
_exptl_crystal_density_method     'not measured' 
_exptl_crystal_F_000              968 
_exptl_absorpt_coefficient_mu     1.395 
_exptl_absorpt_correction_type    'psi-scans'
_exptl_absorpt_correction_T_min   0.706
_exptl_absorpt_correction_T_max   0.759 
_exptl_absorpt_process_details    ? 
 
_exptl_special_details 
; 
 ? 
; 
 
_diffrn_ambient_temperature       '293(1) - 298(1)'

_diffrn_radiation_wavelength      0.71073 
_diffrn_radiation_type            MoK\a 
_diffrn_radiation_source          'fine-focus sealed tube' 
_diffrn_radiation_monochromator   graphite 
_diffrn_measurement_device        '\k-geometry diffractometer'
_diffrn_measurement_device_type   'Nonius CAD-4'
_diffrn_measurement_method        'omega-(1/3)theta scan'
_diffrn_standards_number          3
_diffrn_standards_interval_count  ? 
_diffrn_standards_interval_time   30 
_diffrn_standards_decay_%         ? 
 
_diffrn_reflns_number             4310 
_diffrn_reflns_av_R_equivalents   0.0773 
_diffrn_reflns_av_sigmaI/netI     0.0643 
_diffrn_reflns_limit_h_min        0 
_diffrn_reflns_limit_h_max        12 
_diffrn_reflns_limit_k_min        0 
_diffrn_reflns_limit_k_max        19 
_diffrn_reflns_limit_l_min        -17 
_diffrn_reflns_limit_l_max        17 
_diffrn_reflns_theta_min          2.06 
_diffrn_reflns_theta_max          27.45 
_reflns_number_total              4305 
_reflns_number_gt                 3234 
_reflns_threshold_expression      >2sigma(I) 
 
_computing_data_collection        'CAD4/PC V2.0 (Nonius, 1996)'
_computing_cell_refinement        'CAD4/PC V2.0 (Nonius, 1996)'
_computing_data_reduction         'XCAD4 (Harms, 1996)'
_computing_structure_solution     'SHELXS-97 (Sheldrick, 1990)' 
_computing_structure_refinement   'SHELXL-97 (Sheldrick, 1997)' 
_computing_molecular_graphics     'SHELXTL Rel. 5.05/V (Siemens, 1996)'
_computing_publication_material   'SHELX-97 (Sheldrick, 1997)'
 
_refine_special_details 
; 
 Refinement of F^2^ against ALL reflections.  The weighted R-factor wR and 
 goodness of fit S are based on F^2^, conventional R-factors R are based 
 on F, with F set to zero for negative F^2^. The threshold expression of 
 F^2^ > 2sigma(F^2^) is used only for calculating R-factors(gt) etc. and is 
 not relevant to the choice of reflections for refinement.  R-factors based 
 on F^2^ are statistically about twice as large as those based on F, and R- 
 factors based on ALL data will be even larger. 
; 
 
_refine_ls_structure_factor_coef  Fsqd  
_refine_ls_matrix_type            full 
_refine_ls_weighting_scheme       calc  
_refine_ls_weighting_details 
 'calc w=1/[\s^2^(Fo^2^)+(0.0310P)^2^+2.8455P] where P=(Fo^2^+2Fc^2^)/3' 
_atom_sites_solution_primary      direct 
_atom_sites_solution_secondary    difmap 
_atom_sites_solution_hydrogens    geom 
_refine_ls_hydrogen_treatment     mixed 
_refine_ls_extinction_method      none 
_refine_ls_extinction_coef        ? 
_refine_ls_number_reflns          4305 
_refine_ls_number_parameters      220 
_refine_ls_number_restraints      0 
_refine_ls_R_factor_all           0.0714 
_refine_ls_R_factor_gt            0.0475 
_refine_ls_wR_factor_ref          0.1220 
_refine_ls_wR_factor_gt           0.1086 
_refine_ls_goodness_of_fit_ref    1.072 
_refine_ls_restrained_S_all       1.072 
_refine_ls_shift/su_max           0.030 
_refine_ls_shift/su_mean          0.001 
 
loop_ 
 _atom_site_label 
 _atom_site_type_symbol 
 _atom_site_fract_x 
 _atom_site_fract_y 
 _atom_site_fract_z 
 _atom_site_U_iso_or_equiv 
 _atom_site_adp_type 
 _atom_site_occupancy 
 _atom_site_symetry_multiplicity 
 _atom_site_calc_flag 
 _atom_site_refinement_flags 
 _atom_site_disorder_assembly 
 _atom_site_disorder_group 
Pd1 Pd 0.13693(4) 0.55533(3) 0.11730(3) 0.03371(12) Uani 1 1 d . . . 
Cl1 Cl 0.11795(14) 0.40413(10) 0.07346(11) 0.0460(3) Uani 1 1 d . . . 
Cl2 Cl -0.00368(15) 0.53769(11) 0.24465(10) 0.0504(4) Uani 1 1 d . . . 
N1 N 0.1586(4) 0.6897(3) 0.1468(3) 0.0363(9) Uani 1 1 d . . . 
C1 C 0.2890(5) 0.7237(4) 0.1662(3) 0.0351(11) Uani 1 1 d . . . 
C2 C 0.3117(6) 0.8159(4) 0.1824(4) 0.0463(13) Uani 1 1 d . . . 
H2 H 0.4019 0.8387 0.1972 0.056 Uiso 1 1 calc R . . 
C3 C 0.1973(7) 0.8733(4) 0.1760(4) 0.0541(15) Uani 1 1 d . . . 
H3 H 0.2099 0.9355 0.1866 0.065 Uiso 1 1 calc R . . 
C4 C 0.0631(7) 0.8383(4) 0.1537(4) 0.0515(15) Uani 1 1 d . . . 
H4 H -0.0143 0.8767 0.1476 0.062 Uiso 1 1 calc R . . 
C5 C 0.0471(6) 0.7464(4) 0.1408(4) 0.0468(13) Uani 1 1 d . . . 
H5 H -0.0425 0.7223 0.1277 0.056 Uiso 1 1 calc R . . 
N2 N 0.2833(4) 0.5767(3) 0.0215(3) 0.0335(9) Uani 1 1 d . . . 
C10 C 0.2663(6) 0.5486(4) -0.0741(4) 0.0396(12) Uani 1 1 d . . . 
H10 H 0.1828 0.5206 -0.0988 0.047 Uiso 1 1 calc R . . 
C9 C 0.3698(6) 0.5602(4) -0.1369(4) 0.0451(13) Uani 1 1 d . . . 
H9 H 0.3553 0.5421 -0.2036 0.054 Uiso 1 1 calc R . . 
C8 C 0.4958(6) 0.5994(4) -0.0984(4) 0.0457(13) Uani 1 1 d . . . 
H8 H 0.5688 0.6054 -0.1383 0.055 Uiso 1 1 calc R . . 
C7 C 0.5113(5) 0.6291(4) -0.0006(4) 0.0379(11) Uani 1 1 d . . . 
H7 H 0.5945 0.6563 0.0258 0.046 Uiso 1 1 calc R . . 
C6 C 0.4037(5) 0.6185(3) 0.0581(4) 0.0342(10) Uani 1 1 d . . . 
C11 C 0.4046(5) 0.6537(3) 0.1647(4) 0.0337(11) Uani 1 1 d . . . 
H11 H 0.3799 0.6023 0.2060 0.040 Uiso 1 1 calc R . . 
N3 N 0.5394(4) 0.6865(3) 0.2079(3) 0.0399(10) Uani 1 1 d . . . 
H3A H 0.5836 0.7263 0.1764 0.048 Uiso 1 1 calc R . . 
C12 C 0.5962(6) 0.6544(4) 0.2980(4) 0.0432(13) Uani 1 1 d . . . 
O1 O 0.5447(4) 0.5913(3) 0.3408(3) 0.0616(12) Uani 1 1 d . . . 
C13 C 0.7271(7) 0.7031(5) 0.3406(5) 0.0662(19) Uani 1 1 d . . . 
H13A H 0.7359 0.6992 0.4125 0.099 Uiso 1 1 calc R . . 
H13B H 0.7219 0.7659 0.3206 0.099 Uiso 1 1 calc R . . 
H13C H 0.8070 0.6752 0.3160 0.099 Uiso 1 1 calc R . . 
S1 S 0.64014(16) 0.86132(11) 0.01715(12) 0.0500(4) Uani 1 1 d . . . 
O2 O 0.7029(5) 0.8148(3) 0.1107(3) 0.0594(12) Uani 1 1 d . . . 
C14 C 0.7447(8) 0.8323(5) -0.0788(5) 0.073(2) Uani 1 1 d . . . 
H14A H 0.8377 0.8555 -0.0622 0.110 Uiso 1 1 calc R . . 
H14B H 0.7050 0.8585 -0.1411 0.110 Uiso 1 1 calc R . . 
H14C H 0.7481 0.7672 -0.0853 0.110 Uiso 1 1 calc R . . 
C15 C 0.6867(8) 0.9781(5) 0.0292(5) 0.0672(19) Uani 1 1 d . . . 
H15A H 0.6490 1.0034 0.0866 0.101 Uiso 1 1 calc R . . 
H15B H 0.6494 1.0104 -0.0300 0.101 Uiso 1 1 calc R . . 
H15C H 0.7868 0.9838 0.0375 0.101 Uiso 1 1 calc R . . 
 
loop_ 
 _atom_site_aniso_label 
 _atom_site_aniso_U_11 
 _atom_site_aniso_U_22 
 _atom_site_aniso_U_33 
 _atom_site_aniso_U_23 
 _atom_site_aniso_U_13 
 _atom_site_aniso_U_12 
Pd1 0.02712(19) 0.0408(2) 0.0331(2) -0.00133(17) 0.00251(14) -0.00378(17) 
Cl1 0.0445(7) 0.0402(7) 0.0523(8) 0.0000(6) 0.0007(6) -0.0024(6) 
Cl2 0.0441(7) 0.0703(10) 0.0380(7) -0.0037(7) 0.0104(6) -0.0129(7) 
N1 0.030(2) 0.045(3) 0.034(2) -0.0057(19) 0.0050(17) -0.0005(18) 
C1 0.035(3) 0.045(3) 0.026(2) -0.002(2) 0.0048(19) -0.007(2) 
C2 0.053(3) 0.047(3) 0.039(3) -0.006(3) 0.007(3) -0.008(3) 
C3 0.076(4) 0.043(3) 0.045(3) -0.003(3) 0.017(3) 0.001(3) 
C4 0.056(4) 0.051(4) 0.047(3) -0.008(3) 0.004(3) 0.013(3) 
C5 0.044(3) 0.056(4) 0.041(3) -0.007(3) 0.006(2) 0.010(3) 
N2 0.030(2) 0.042(2) 0.029(2) -0.0008(17) 0.0064(16) 0.0003(17) 
C10 0.037(3) 0.043(3) 0.037(3) -0.010(2) 0.000(2) -0.002(2) 
C9 0.056(3) 0.050(3) 0.030(3) -0.002(2) 0.010(2) 0.004(3) 
C8 0.046(3) 0.049(3) 0.045(3) 0.006(3) 0.017(3) 0.003(3) 
C7 0.031(2) 0.042(3) 0.042(3) 0.000(2) 0.006(2) -0.002(2) 
C6 0.029(2) 0.036(3) 0.037(3) 0.002(2) 0.0019(19) -0.002(2) 
C11 0.026(2) 0.041(3) 0.034(2) 0.003(2) 0.0021(19) -0.004(2) 
N3 0.033(2) 0.048(3) 0.037(2) 0.008(2) -0.0023(18) -0.011(2) 
C12 0.039(3) 0.050(3) 0.039(3) -0.004(2) -0.004(2) 0.001(2) 
O1 0.051(3) 0.076(3) 0.055(3) 0.020(2) -0.009(2) -0.010(2) 
C13 0.054(4) 0.077(5) 0.061(4) -0.003(4) -0.020(3) -0.010(4) 
S1 0.0453(8) 0.0520(9) 0.0523(8) 0.0039(7) 0.0037(6) -0.0009(7) 
O2 0.060(3) 0.069(3) 0.049(2) 0.018(2) 0.005(2) -0.008(2) 
C14 0.097(6) 0.074(5) 0.053(4) 0.007(4) 0.024(4) 0.029(4) 
C15 0.082(5) 0.052(4) 0.070(4) 0.000(3) 0.019(4) -0.003(4) 
 
_geom_special_details 
; 
 All esds (except the esd in the dihedral angle between two l.s. planes) 
 are estimated using the full covariance matrix.  The cell esds are taken 
 into account individually in the estimation of esds in distances, angles 
 and torsion angles; correlations between esds in cell parameters are only 
 used when they are defined by crystal symmetry.  An approximate (isotropic) 
 treatment of cell esds is used for estimating esds involving l.s. planes. 
; 
 
loop_ 
 _geom_bond_atom_site_label_1 
 _geom_bond_atom_site_label_2 
 _geom_bond_distance 
 _geom_bond_site_symmetry_2 
 _geom_bond_publ_flag 
Pd1 N1 2.017(4) . ? 
Pd1 N2 2.029(4) . ? 
Pd1 Cl1 2.2970(14) . ? 
Pd1 Cl2 2.3035(14) . ? 
N1 C1 1.348(6) . ? 
N1 C5 1.353(7) . ? 
C1 C2 1.384(8) . ? 
C1 C11 1.515(7) . ? 
C2 C3 1.381(8) . ? 
C2 H2 0.9300 . ? 
C3 C4 1.391(9) . ? 
C3 H3 0.9300 . ? 
C4 C5 1.365(8) . ? 
C4 H4 0.9300 . ? 
C5 H5 0.9300 . ? 
N2 C10 1.340(6) . ? 
N2 C6 1.354(6) . ? 
C10 C9 1.380(7) . ? 
C10 H10 0.9300 . ? 
C9 C8 1.389(8) . ? 
C9 H9 0.9300 . ? 
C8 C7 1.376(7) . ? 
C8 H8 0.9300 . ? 
C7 C6 1.374(7) . ? 
C7 H7 0.9300 . ? 
C6 C11 1.519(7) . ? 
C11 N3 1.443(6) . ? 
C11 H11 0.9800 . ? 
N3 C12 1.356(7) . ? 
N3 H3A 0.8600 . ? 
C12 O1 1.221(7) . ? 
C12 C13 1.505(8) . ? 
C13 H13A 0.9600 . ? 
C13 H13B 0.9600 . ? 
C13 H13C 0.9600 . ? 
S1 O2 1.498(4) . ? 
S1 C14 1.768(7) . ? 
S1 C15 1.774(7) . ? 
C14 H14A 0.9600 . ? 
C14 H14B 0.9600 . ? 
C14 H14C 0.9600 . ? 
C15 H15A 0.9600 . ? 
C15 H15B 0.9600 . ? 
C15 H15C 0.9600 . ? 
 
loop_ 
 _geom_angle_atom_site_label_1 
 _geom_angle_atom_site_label_2 
 _geom_angle_atom_site_label_3 
 _geom_angle 
 _geom_angle_site_symmetry_1 
 _geom_angle_site_symmetry_3 
 _geom_angle_publ_flag 
N1 Pd1 N2 84.77(17) . . ? 
N1 Pd1 Cl1 176.11(12) . . ? 
N2 Pd1 Cl1 91.64(13) . . ? 
N1 Pd1 Cl2 91.20(12) . . ? 
N2 Pd1 Cl2 171.43(12) . . ? 
Cl1 Pd1 Cl2 92.55(6) . . ? 
C1 N1 C5 119.8(5) . . ? 
C1 N1 Pd1 118.3(4) . . ? 
C5 N1 Pd1 121.7(4) . . ? 
N1 C1 C2 121.3(5) . . ? 
N1 C1 C11 114.5(4) . . ? 
C2 C1 C11 124.1(5) . . ? 
C3 C2 C1 118.4(6) . . ? 
C3 C2 H2 120.8 . . ? 
C1 C2 H2 120.8 . . ? 
C2 C3 C4 120.1(6) . . ? 
C2 C3 H3 119.9 . . ? 
C4 C3 H3 119.9 . . ? 
C5 C4 C3 118.8(6) . . ? 
C5 C4 H4 120.6 . . ? 
C3 C4 H4 120.6 . . ? 
N1 C5 C4 121.5(6) . . ? 
N1 C5 H5 119.3 . . ? 
C4 C5 H5 119.3 . . ? 
C10 N2 C6 119.9(4) . . ? 
C10 N2 Pd1 122.5(3) . . ? 
C6 N2 Pd1 117.6(3) . . ? 
N2 C10 C9 121.6(5) . . ? 
N2 C10 H10 119.2 . . ? 
C9 C10 H10 119.2 . . ? 
C10 C9 C8 118.8(5) . . ? 
C10 C9 H9 120.6 . . ? 
C8 C9 H9 120.6 . . ? 
C7 C8 C9 119.0(5) . . ? 
C7 C8 H8 120.5 . . ? 
C9 C8 H8 120.5 . . ? 
C6 C7 C8 120.0(5) . . ? 
C6 C7 H7 120.0 . . ? 
C8 C7 H7 120.0 . . ? 
N2 C6 C7 120.6(5) . . ? 
N2 C6 C11 114.5(4) . . ? 
C7 C6 C11 124.9(4) . . ? 
N3 C11 C1 113.4(4) . . ? 
N3 C11 C6 113.9(4) . . ? 
C1 C11 C6 108.2(4) . . ? 
N3 C11 H11 107.0 . . ? 
C1 C11 H11 107.0 . . ? 
C6 C11 H11 107.0 . . ? 
C12 N3 C11 120.0(4) . . ? 
C12 N3 H3A 120.0 . . ? 
C11 N3 H3A 120.0 . . ? 
O1 C12 N3 122.5(5) . . ? 
O1 C12 C13 123.1(5) . . ? 
N3 C12 C13 114.5(5) . . ? 
C12 C13 H13A 109.5 . . ? 
C12 C13 H13B 109.5 . . ? 
H13A C13 H13B 109.5 . . ? 
C12 C13 H13C 109.5 . . ? 
H13A C13 H13C 109.5 . . ? 
H13B C13 H13C 109.5 . . ? 
O2 S1 C14 106.9(3) . . ? 
O2 S1 C15 106.8(3) . . ? 
C14 S1 C15 98.1(4) . . ? 
S1 C14 H14A 109.5 . . ? 
S1 C14 H14B 109.5 . . ? 
H14A C14 H14B 109.5 . . ? 
S1 C14 H14C 109.5 . . ? 
H14A C14 H14C 109.5 . . ? 
H14B C14 H14C 109.5 . . ? 
S1 C15 H15A 109.5 . . ? 
S1 C15 H15B 109.5 . . ? 
H15A C15 H15B 109.5 . . ? 
S1 C15 H15C 109.5 . . ? 
H15A C15 H15C 109.5 . . ? 
H15B C15 H15C 109.5 . . ? 
 
loop_ 
 _geom_torsion_atom_site_label_1 
 _geom_torsion_atom_site_label_2 
 _geom_torsion_atom_site_label_3 
 _geom_torsion_atom_site_label_4 
 _geom_torsion 
 _geom_torsion_site_symmetry_1 
 _geom_torsion_site_symmetry_2 
 _geom_torsion_site_symmetry_3 
 _geom_torsion_site_symmetry_4 
 _geom_torsion_publ_flag 
N2 Pd1 N1 C1 -48.2(4) . . . . ? 
Cl1 Pd1 N1 C1 -71.0(19) . . . . ? 
Cl2 Pd1 N1 C1 124.3(3) . . . . ? 
N2 Pd1 N1 C5 127.3(4) . . . . ? 
Cl1 Pd1 N1 C5 104.5(18) . . . . ? 
Cl2 Pd1 N1 C5 -60.2(4) . . . . ? 
C5 N1 C1 C2 1.3(7) . . . . ? 
Pd1 N1 C1 C2 176.9(4) . . . . ? 
C5 N1 C1 C11 -176.5(4) . . . . ? 
Pd1 N1 C1 C11 -1.0(5) . . . . ? 
N1 C1 C2 C3 -1.4(8) . . . . ? 
C11 C1 C2 C3 176.2(5) . . . . ? 
C1 C2 C3 C4 -0.1(8) . . . . ? 
C2 C3 C4 C5 1.6(9) . . . . ? 
C1 N1 C5 C4 0.3(8) . . . . ? 
Pd1 N1 C5 C4 -175.2(4) . . . . ? 
C3 C4 C5 N1 -1.7(9) . . . . ? 
N1 Pd1 N2 C10 -129.7(4) . . . . ? 
Cl1 Pd1 N2 C10 48.8(4) . . . . ? 
Cl2 Pd1 N2 C10 168.0(7) . . . . ? 
N1 Pd1 N2 C6 52.5(4) . . . . ? 
Cl1 Pd1 N2 C6 -129.0(4) . . . . ? 
Cl2 Pd1 N2 C6 -9.8(11) . . . . ? 
C6 N2 C10 C9 0.7(8) . . . . ? 
Pd1 N2 C10 C9 -177.1(4) . . . . ? 
N2 C10 C9 C8 2.1(9) . . . . ? 
C10 C9 C8 C7 -2.9(9) . . . . ? 
C9 C8 C7 C6 1.1(8) . . . . ? 
C10 N2 C6 C7 -2.6(8) . . . . ? 
Pd1 N2 C6 C7 175.2(4) . . . . ? 
C10 N2 C6 C11 175.2(5) . . . . ? 
Pd1 N2 C6 C11 -6.9(6) . . . . ? 
C8 C7 C6 N2 1.8(8) . . . . ? 
C8 C7 C6 C11 -175.9(5) . . . . ? 
N1 C1 C11 N3 -166.4(4) . . . . ? 
C2 C1 C11 N3 15.8(7) . . . . ? 
N1 C1 C11 C6 66.2(5) . . . . ? 
C2 C1 C11 C6 -111.6(5) . . . . ? 
N2 C6 C11 N3 171.8(4) . . . . ? 
C7 C6 C11 N3 -10.4(7) . . . . ? 
N2 C6 C11 C1 -61.1(6) . . . . ? 
C7 C6 C11 C1 116.7(5) . . . . ? 
C1 C11 N3 C12 108.4(6) . . . . ? 
C6 C11 N3 C12 -127.2(5) . . . . ? 
C11 N3 C12 O1 7.7(9) . . . . ? 
C11 N3 C12 C13 -172.2(5) . . . . ? 
 
_diffrn_measured_fraction_theta_max    0.999 
_diffrn_reflns_theta_full              27.45 
_diffrn_measured_fraction_theta_full   0.999 
_refine_diff_density_max    0.607 
_refine_diff_density_min   -0.551 
_refine_diff_density_rms    0.116 

#===END
